# Supplementary material
Source: publisher figshare collection journal article supplement (https://geolsoc.figshare.com/ndownloader/files/25778048)

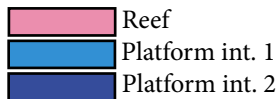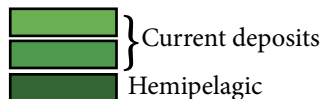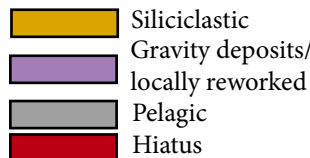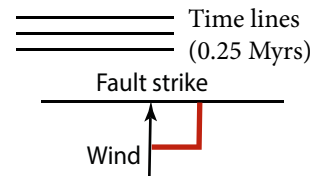

Model Run 30: base model

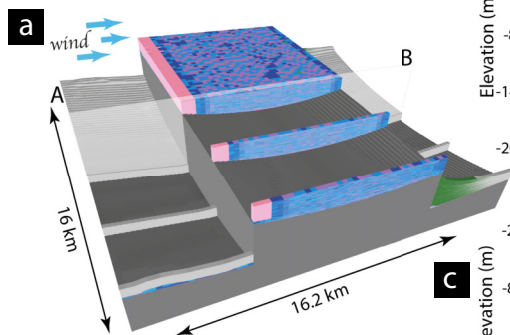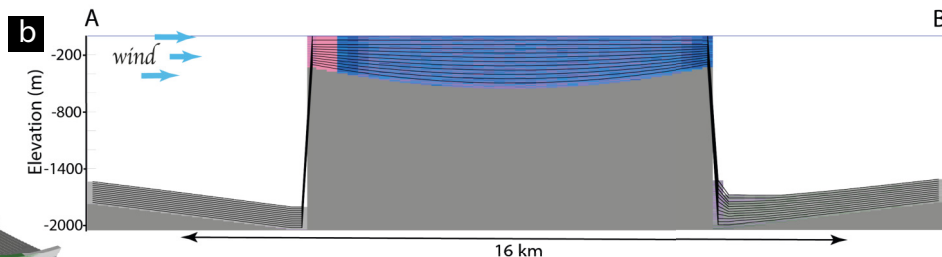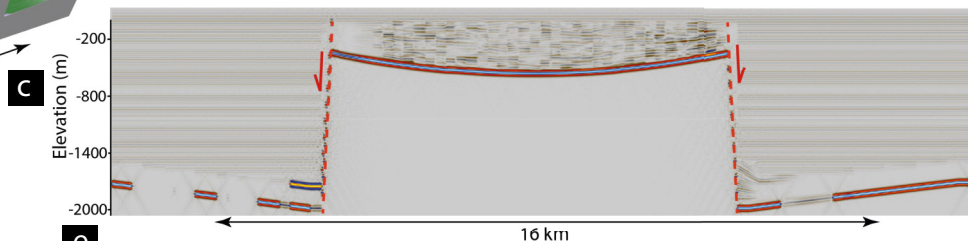

Model Run 32: eustatic control

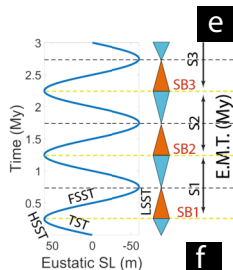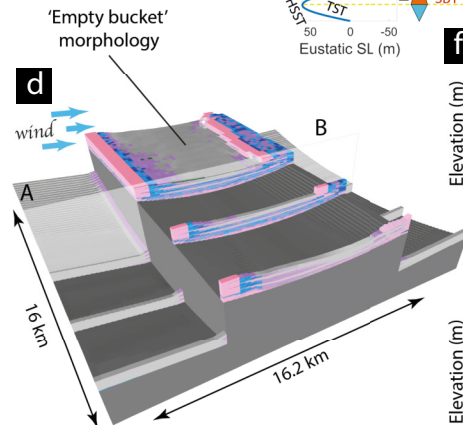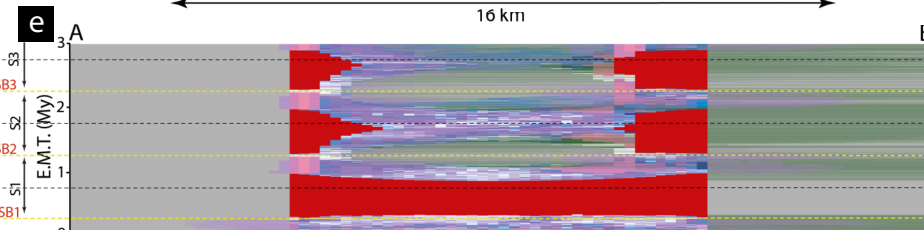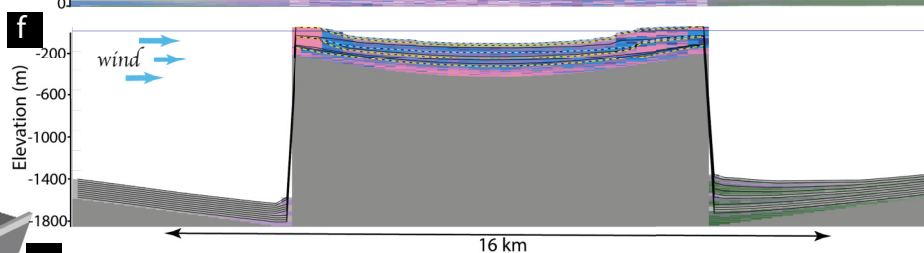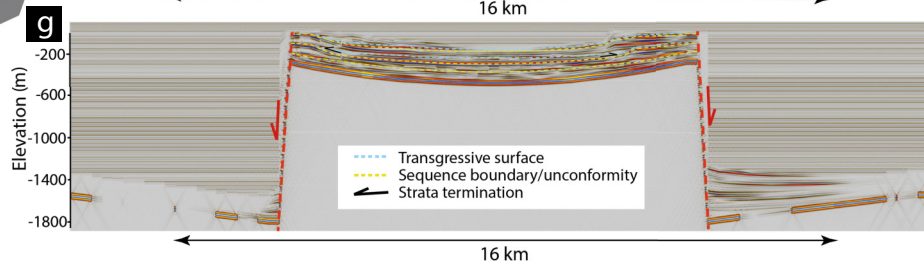

Supplement: Supplementary file 1 [file 25778048]
